# Supplementary material for: Proximal femoral head transcriptome reveals novel candidate genes related to epiphysiolysis in broiler chickens
Source: PubMed Central journal article supplement (PMC6937697; doi:10.1186/s12864-019-6411-9), 2019-12-30

# MDS

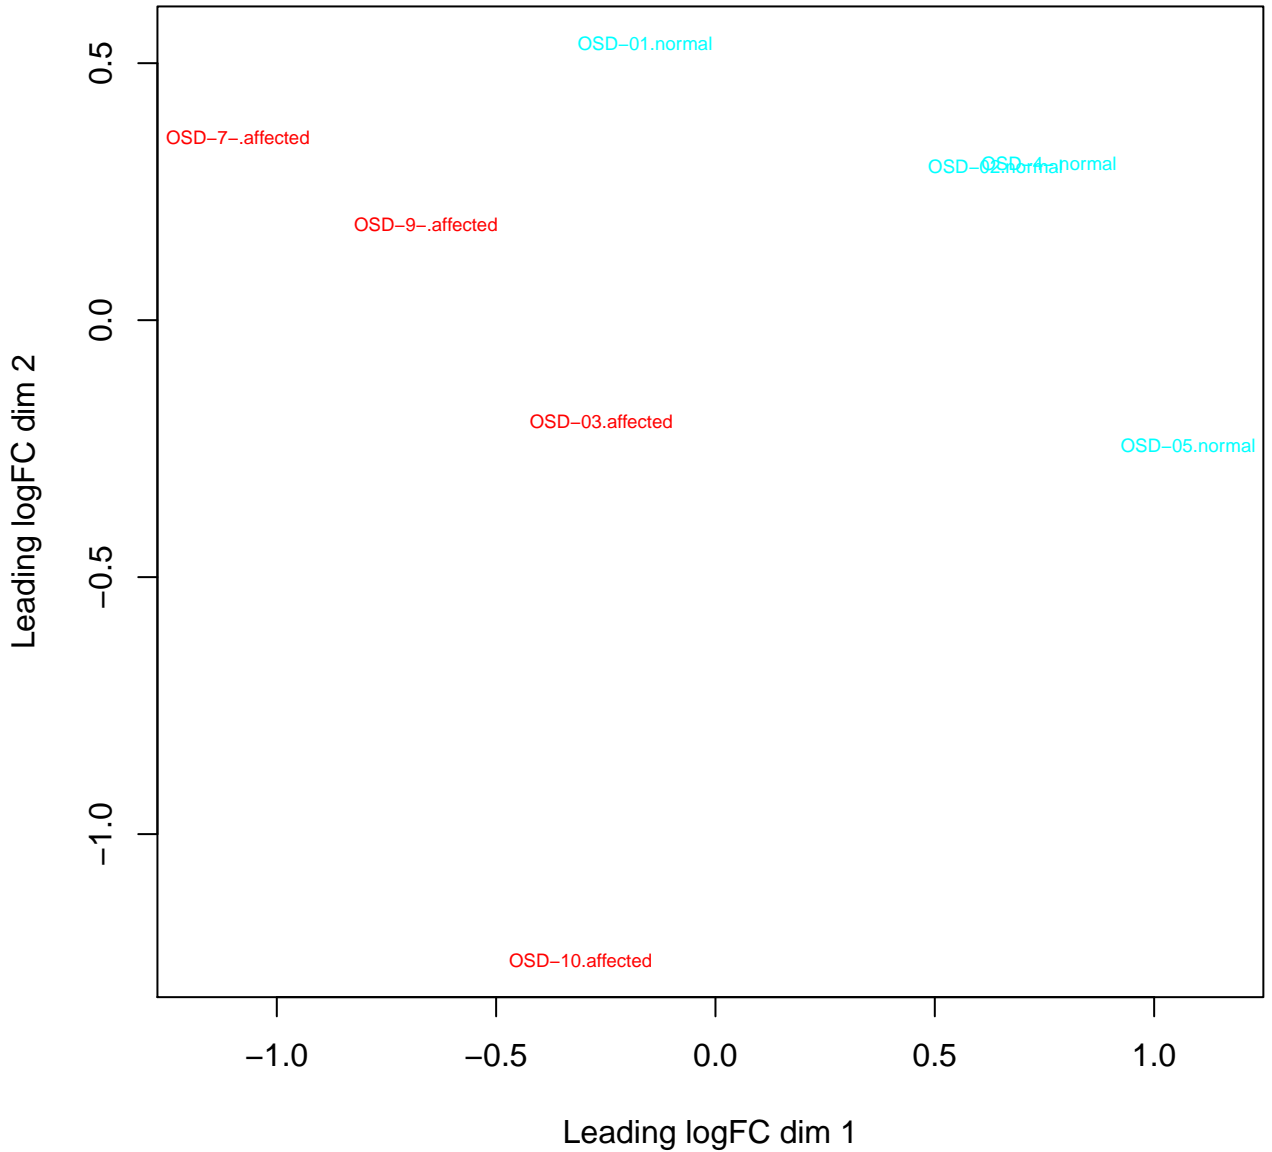

Supplement: 12864_2019_6411_MOESM1_ESM.pdf [file 12864_2019_6411_MOESM1_ESM.pdf]
